# Supplementary material
Source: PubMed Central journal article supplement (PMC3567344)
Supplement: supp_blood-2012-04-426965_TableS3andS4.pdf [file supp_blood-2012-04-426965_TableS3andS4.pdf]

## Sequences of primers used.

### For the CUX1-CLDN7 fusion PCR:

CUX1 fusion F: 5' GAAGCGCTTTGATTTACAGCAG 3'  
CUX1 fusion R: 5' ATACCAGGAGCAAGCTACCAAG 3'  
non-disrupted CUX1 F: 5' GAAGCGCTTTGATTTACAGCAG 3'  
non-disrupted CUX1 R: 5' GCATCAATCTCTCCTTGAAAC 3'  
non-disrupted CLDN7 F: 5' TATACGGCCTTCTTCACTTTG 3'  
non-disrupted CLDN7 R: 5' CTATGCGGGTGACAACATCATC 3'

### For human CUX1 qPCR:

CUX1 F: 5' ACAGACACTGAAGAACCAAGCCGA 3'  
CUX1 R: 5' TGTGAGGCCAGCTGGAGGGA 3'  
GAPDH F: 5' TGCCTCCTGCACCACCAACT 3'  
GAPDH R: 5' CGCCTGCTTACCACCTTC 3'

### For *Drosophila* hemocyte qPCR:

cut F: 5' ACATGCGGCTGCCTTGGGAC 3'  
cut R: 5' CCGATCCTCGGACATGGAATCATC 3'  
cut DLP: 5' 6-FAM AGCGTTTCAGTTTGCCGCCGCCCAA 3'  
rpL32 F: 5' AAGCGGCGACGCACTCTGTT 3'  
rpL32 R: 5' GCCCAGCATACAGGCCCAAG 3'  
rpL32 DLP: 5' JOE - AAGCTGTGCGACAAATGGCGCAAGCCCAA 3'

| <b>Sample</b> | <b>7q22</b> | <b>Aligned bases</b> | <b>Aligned reads</b> |
|---------------|-------------|----------------------|----------------------|
| A19           | diploid     | 1,389,152,225        | 24,397,792           |
| A20           | diploid     | 1,502,840,106        | 25,306,922           |
| A21           | diploid     | 4,892,225,900        | 59,784,386           |
| A35           | diploid     | 2,785,381,733        | 39,401,504           |
| A44           | diploid     | 2,295,307,663        | 30,273,264           |
| A53           | diploid     | 2,642,078,275        | 35,254,290           |
| A72           | diploid     | 5,844,434,544        | 68,046,387           |
| T01           | diploid     | 958,468,068          | 26,624,113           |
| T05           | diploid     | 1,005,901,090        | 16,414,305           |
| T55           | diploid     | 4,127,081,110        | 52,797,375           |
| T67           | diploid     | 3,452,185,721        | 55,948,201           |
| T68           | diploid     | 2,157,161,689        | 33,404,647           |
| A36           | haploid     | 2,415,150,529        | 32,995,534           |
| A56           | haploid     | 2,286,932,090        | 34,387,812           |
| A65           | haploid     | 6,975,702,255        | 82,573,524           |
| T03           | haploid     | 3,611,483,214        | 50,617,496           |
| T04           | haploid     | 4,152,283,623        | 51,891,346           |
| T08           | haploid     | 1,420,993,554        | 31,357,523           |
| T12           | haploid     | 1,527,411,829        | 30,436,791           |
| T16           | haploid     | 1,381,409,420        | 31,107,825           |
| T19           | haploid     | 1,358,711,931        | 32,396,763           |
| T20           | haploid     | 2,483,904,799        | 45,749,242           |
| T52           | haploid     | 2,268,782,392        | 24,373,804           |

|                             |                           | <b>Aligned bases</b> | <b>Aligned reads</b> |
|-----------------------------|---------------------------|----------------------|----------------------|
| <b>All samples</b>          | <b>mean</b>               | 2,736,303,642        | 39,806,124           |
|                             | <b>minimum</b>            | 958,468,068          | 16,414,305           |
|                             | <b>maximum</b>            | 6,975,702,255        | 82,573,524           |
|                             | <b>standard deviation</b> | 1,581,762,409        | 16,065,543           |
| <b>Haploid 7q22 sample</b>  | <b>mean</b>               | 2,716,615,058        | 40,717,060           |
|                             | <b>minimum</b>            | 1,358,711,931        | 24,373,804           |
|                             | <b>maximum</b>            | 6,975,702,255        | 82,573,524           |
|                             | <b>standard deviation</b> | 1,680,817,892        | 16,497,887           |
| <b>Diploid 7q22 samples</b> | <b>mean</b>               | 2,542,478,317        | 35,973,322           |
|                             | <b>minimum</b>            | 958,468,068          | 16,414,305           |
|                             | <b>maximum</b>            | 5,844,434,544        | 68,046,387           |
|                             | <b>standard deviation</b> | 1,560,411,670        | 16,345,527           |
